# Supplementary material
Source: PubMed Central journal article supplement (PMC10089257)
Supplement: mmc1.pdf [file mmc1.pdf]

**Supplemental data 1.****Multicollinearity analysis in multiple regression analysis for PhA, ECW/TBW and SMI**

## PhA

| Variable        | Total Subjects (n=371) |                                     | Males (n=209) |                                     | Females (n=162) |                                     |
|-----------------|------------------------|-------------------------------------|---------------|-------------------------------------|-----------------|-------------------------------------|
|                 | VIF                    | R <sup>2</sup> with other variables | VIF           | R <sup>2</sup> with other variables | VIF             | R <sup>2</sup> with other variables |
| Male            | 1.461                  | 0.315                               |               |                                     |                 |                                     |
| Age             | 1.742                  | 0.426                               | 1.876         | 0.467                               | 1.747           | 0.428                               |
| BMI             | 1.325                  | 0.245                               | 1.503         | 0.335                               | 1.219           | 0.180                               |
| Alb             | 1.267                  | 0.211                               | 1.383         | 0.277                               | 1.173           | 0.148                               |
| Cr              | 1.253                  | 0.202                               | 1.186         | 0.157                               | 1.123           | 0.109                               |
| Current Smoking | 1.178                  | 0.151                               | 1.139         | 0.122                               | 1.045           | 0.043                               |
| ARB/ACEi        | 1.126                  | 0.111                               | 1.076         | 0.071                               | 1.233           | 0.189                               |
| SGLT2i          | 1.023                  | 0.022                               | 1.047         | 0.045                               | 1.056           | 0.052                               |
| PhA             | 1.873                  | 0.466                               | 1.786         | 0.434                               | 1.670           | 0.401                               |

## ECW/TBW

| Variable        | Total Subjects (n=371) |                                     | Males (n=209) |                                     | Females (n=162) |                                     |
|-----------------|------------------------|-------------------------------------|---------------|-------------------------------------|-----------------|-------------------------------------|
|                 | VIF                    | R <sup>2</sup> with other variables | VIF           | R <sup>2</sup> with other variables | VIF             | R <sup>2</sup> with other variables |
| Male            | 1.322                  | 0.244                               |               |                                     |                 |                                     |
| Age             | 1.713                  | 0.416                               | 1.861         | 0.463                               | 1.696           | 0.410                               |
| BMI             | 1.304                  | 0.233                               | 1.456         | 0.313                               | 1.222           | 0.181                               |
| Alb             | 1.283                  | 0.221                               | 1.381         | 0.276                               | 1.225           | 0.183                               |
| Cr              | 1.253                  | 0.202                               | 1.188         | 0.158                               | 1.123           | 0.109                               |
| Current Smoking | 1.177                  | 0.150                               | 1.139         | 0.122                               | 1.043           | 0.041                               |
| ARB/ACEi        | 1.119                  | 0.106                               | 1.076         | 0.071                               | 1.201           | 0.168                               |
| SGLT2i          | 1.023                  | 0.022                               | 1.050         | 0.047                               | 1.060           | 0.056                               |
| ECW/TBW         | 1.615                  | 0.381                               | 1.606         | 0.377                               | 1.630           | 0.387                               |

| SMI             |                        |                                     |               |                                     |                 |                                     |
|-----------------|------------------------|-------------------------------------|---------------|-------------------------------------|-----------------|-------------------------------------|
|                 | Total Subjects (n=371) |                                     | Males (n=209) |                                     | Females (n=162) |                                     |
| Variable        | VIF                    | R <sup>2</sup> with other variables | VIF           | R <sup>2</sup> with other variables | VIF             | R <sup>2</sup> with other variables |
| Male            | 2.621                  | 0.619                               |               |                                     |                 |                                     |
| Age             | 1.673                  | 0.402                               | 1.915         | 0.478                               | 1.519           | 0.342                               |
| BMI             | 2.722                  | 0.633                               | 2.644         | 0.622                               | 3.024           | 0.669                               |
| Alb             | 1.134                  | 0.118                               | 1.257         | 0.205                               | 1.042           | 0.041                               |
| Cr              | 1.272                  | 0.214                               | 1.204         | 0.169                               | 1.131           | 0.116                               |
| Current Smoking | 1.175                  | 0.149                               | 1.136         | 0.120                               | 1.046           | 0.044                               |
| ARB/ACEi        | 1.139                  | 0.122                               | 1.100         | 0.091                               | 1.214           | 0.176                               |
| SGLT2i          | 1.022                  | 0.022                               | 1.032         | 0.031                               | 1.042           | 0.041                               |
| SMI             | 4.606                  | 0.783                               | 3.202         | 0.688                               | 3.383           | 0.704                               |

VIF: variance inflation factor

**Supplemental data 2.**

**Multiple linear regression analysis with ECW/ICW for determinants of Hgb and Hct levels in the cross-sectional study**

| Variable        | Total Subjects (n=371)      |         |                             |         | Males (n=209)               |         |                             |         | Females (n=162)             |         |                             |         |
|-----------------|-----------------------------|---------|-----------------------------|---------|-----------------------------|---------|-----------------------------|---------|-----------------------------|---------|-----------------------------|---------|
|                 | Hgb (R <sup>2</sup> =0.469) |         | Hct (R <sup>2</sup> =0.473) |         | Hgb (R <sup>2</sup> =0.421) |         | Hct (R <sup>2</sup> =0.418) |         | Hgb (R <sup>2</sup> =0.440) |         | Hct (R <sup>2</sup> =0.510) |         |
|                 | t value                     | p value |
| Male            | 6.526                       | <0.001  | 5.408                       | <0.001  |                             |         |                             |         |                             |         |                             |         |
| Age             | -2.151                      | 0.032   | -1.731                      | 0.084   | -1.943                      | 0.053   | -1.508                      | 0.133   | -0.224                      | 0.823   | -0.130                      | 0.897   |
| BMI             | 3.504                       | 0.001   | 3.538                       | <0.001  | 2.144                       | 0.033   | 1.835                       | 0.068   | 2.616                       | 0.010   | 3.030                       | 0.003   |
| Alb             | 2.577                       | 0.010   | 1.825                       | 0.069   | 2.109                       | 0.036   | 1.315                       | 0.190   | 1.934                       | 0.055   | 1.888                       | 0.061   |
| Cr              | -3.752                      | <0.001  | -4.336                      | <0.001  | -1.821                      | 0.070   | -2.031                      | 0.044   | -4.548                      | <0.001  | -5.324                      | <0.001  |
| Current Smoking | 2.212                       | 0.028   | 2.162                       | 0.031   | 1.417                       | 0.158   | 1.491                       | 0.138   | 2.771                       | 0.006   | 2.456                       | 0.015   |
| ARB/ACEi        | -2.040                      | 0.042   | -2.653                      | 0.008   | -0.569                      | 0.570   | -0.908                      | 0.365   | -2.310                      | 0.022   | -2.926                      | 0.004   |
| SGLT2i          | 5.579                       | <0.001  | 7.723                       | <0.001  | 3.841                       | <0.001  | 4.982                       | <0.001  | 3.680                       | <0.001  | 5.611                       | <0.001  |
| ECW/ICW         | -5.883                      | <0.001  | -6.034                      | <0.001  | -4.717                      | <0.001  | -4.964                      | <0.001  | -3.502                      | 0.001   | -3.514                      | 0.001   |

**Supplemental data 3.**

**Multiple linear regression analysis for determinants of SMI in the cross-sectional study**

| Variable        | Total Subjects (n=371)<br>(R <sup>2</sup> =0.783) |         | Males (n=209)<br>(R <sup>2</sup> =0.688) |         | Females (n=162)<br>(R <sup>2</sup> =0.704) |         |
|-----------------|---------------------------------------------------|---------|------------------------------------------|---------|--------------------------------------------|---------|
|                 | t value                                           | p value | t value                                  | p value | t value                                    | p value |
| Male            | 19.392                                            | <0.001  |                                          |         |                                            |         |
| Age             | -8.499                                            | <0.001  | -6.677                                   | <0.001  | -4.733                                     | <0.001  |
| BMI             | 19.850                                            | <0.001  | 12.809                                   | <0.001  | 15.146                                     | <0.001  |
| Alb             | -1.305                                            | 0.193   | -1.572                                   | 0.118   | -0.015                                     | 0.988   |
| Cr              | 2.394                                             | 0.017   | 1.739                                    | 0.084   | 1.107                                      | 0.270   |
| Current Smoking | 0.394                                             | 0.694   | 0.040                                    | 0.968   | 0.674                                      | 0.501   |
| ARB/ACEi        | 2.611                                             | 0.009   | 2.104                                    | 0.037   | 1.468                                      | 0.144   |
| SGLT2i          | -0.379                                            | 0.705   | -1.092                                   | 0.276   | 0.795                                      | 0.428   |

**Supplemental data 4.**

**Multiple linear regression analysis with diabetic factors for determinants of PhA, ECW/TBW and SMI in the cross-sectional study**

| Variable       | PhA (n=371)<br>(R <sup>2</sup> =0.433) |       |         | ECW/TBW (n=371)<br>(R <sup>2</sup> =0.329) |       |         | SMI (n=371)<br>(R <sup>2</sup> =0.519) |       |         |
|----------------|----------------------------------------|-------|---------|--------------------------------------------|-------|---------|----------------------------------------|-------|---------|
|                | t value                                | VIF   | p value | t value                                    | VIF   | p value | t value                                | VIF   | p value |
| Male           | 8.165                                  | 1.014 | <0.001  | -3.686                                     | 1.014 | <0.001  | 15.240                                 | 1.014 | <0.001  |
| Age            | -11.440                                | 1.276 | <0.001  | 9.980                                      | 1.276 | <0.001  | -9.866                                 | 1.276 | <0.001  |
| HbA1c          | -0.798                                 | 1.313 | 0.426   | 0.764                                      | 1.313 | 0.445   | 1.299                                  | 1.313 | 0.195   |
| Duration of DM | -2.244                                 | 1.526 | 0.026   | 2.098                                      | 1.526 | 0.037   | 1.239                                  | 1.526 | 0.216   |
| SU or Glinide  | -0.129                                 | 1.290 | 0.898   | -0.035                                     | 1.290 | 0.972   | -1.582                                 | 1.290 | 0.115   |
| BG             | 1.686                                  | 1.236 | 0.093   | -1.575                                     | 1.236 | 0.116   | 0.495                                  | 1.236 | 0.621   |
| DPP-4i         | -0.126                                 | 1.498 | 0.900   | 0.824                                      | 1.498 | 0.410   | 0.550                                  | 1.498 | 0.583   |
| SGLT2i         | 1.720                                  | 1.180 | 0.086   | -1.403                                     | 1.180 | 0.162   | 1.331                                  | 1.180 | 0.184   |
| αGI            | 0.944                                  | 1.201 | 0.346   | -0.290                                     | 1.201 | 0.772   | 1.655                                  | 1.201 | 0.099   |
| Pioglitazone   | -1.039                                 | 1.081 | 0.300   | 0.742                                      | 1.081 | 0.458   | 0.505                                  | 1.081 | 0.614   |
| Insulin        | -2.557                                 | 1.472 | 0.011   | 1.864                                      | 1.472 | 0.063   | -3.196                                 | 1.472 | 0.002   |
| GLP-1RA        | -0.830                                 | 1.406 | 0.407   | 1.407                                      | 1.406 | 0.160   | 2.079                                  | 1.406 | 0.038   |
